# Supplementary material for: The Polymorphic Membrane Protein G Has a Neutral Effect and the Plasmid Glycoprotein 3 an Antagonistic Effect on the Ability of the Major Outer Membrane Protein to Elicit Protective Immune Responses against a Chlamydia muridarum Respiratory Challenge
Source: MDPI journal article supplement (doi:10.3390/vaccines11030504), 2023-02-21
Supplement: s1 [file s1]

## Supplementary Materials

**Table S1.** Vaccine induced antibody responses in sera the day before the *C. muridarum* intranasal challenge.

| Immunization groups | Anti EB serum GMT (range)             |                                          | IgG2a/IgG1 ratio | Neutralizing Ab GMT (range) |
|---------------------|---------------------------------------|------------------------------------------|------------------|-----------------------------|
|                     | IgG1                                  | IgG2a                                    |                  |                             |
| Pgp3                | 1131 <sup>a,b,c,d</sup> (200–12,800)  | 9870 <sup>a,b,c,d</sup> (6400–12,800)    | 8.7              | <50 (<50 – <50)             |
| PmpG                | 436 <sup>a,b,c,d</sup> (200–800)      | 6400 <sup>a,b,c,d</sup> (3200–12,800)    | 14.7             | <50 (<50 – <50)             |
| MOMP + Pgp3         | 23,475 <sup>a,b</sup> (12,800–51,200) | 223,336 <sup>a</sup> (102,400–409,600)   | 9.5              | 79 (<50 – 800)              |
| MOMP + PmpG         | 39,481 <sup>a</sup> (12,800–102,400)  | 265,593 <sup>a</sup> (102,400–819,200)   | 6.7              | 63 (<50 – 400)              |
| MOMP                | 64,508 <sup>a</sup> (12,800–102,400)  | 409,600 <sup>a</sup> (102,400–1,638,400) | 6.4              | 159 (<50 – 800)             |
| PBS                 | <100                                  | <100                                     | -                | <50                         |

GMT: Geometric mean titer. <sup>a</sup>  $P < 0.05$  by the Mann-Whitney's *U*-test compared with the PBS group.

<sup>b</sup>  $P < 0.05$  by the Mann-Whitney's *U*-test compared with the MOMP group. <sup>c</sup>  $P < 0.05$  by the Mann-Whitney's *U*-test compared with the MOMP + PmpG group. <sup>d</sup>  $P < 0.05$  by the Mann-Whitney's *U*-test compared with the MOMP + Pgp3 group.

**Table S2.** Vaccine induced antibody responses in sera the day before the *C. muridarum* intranasal challenge.

| Immunization groups | IgG GMT (range) in sera against Pgp3, PmpG and MOMP ( $\times 10^3$ ) |                                       |                                    |
|---------------------|-----------------------------------------------------------------------|---------------------------------------|------------------------------------|
|                     | MOMP                                                                  | Pgp3                                  | PmpG                               |
| Pgp3                | n/m                                                                   | 2826.5 <sup>a</sup> (1,280.0–5,120.0) | n/m                                |
| PmpG                | n/m                                                                   | n/m                                   | 905.1 <sup>a</sup> (640.0–1,280.0) |
| MOMP + Pgp3         | 69.6 <sup>a,b</sup> (40.0–80.0)                                       | 2560.0 <sup>a</sup> (2,560.0–2,560.0) | n/m                                |
| MOMP + PmpG         | 89.8 <sup>a</sup> (80.0–160.0)                                        | n/m                                   | 543.5 <sup>a,c</sup> (320.0–640.0) |
| MOMP                | 139.9 <sup>a</sup> (40.0–409.6)                                       | n/m                                   | n/m                                |
| PBS                 | <100                                                                  | <100                                  | <100                               |

GMT: Geometric mean titer. n/m: Not measured. <sup>a</sup>  $P < 0.05$  by the Mann-Whitney's *U*-test compared with the PBS group. <sup>b</sup>  $P < 0.05$  by the Mann-Whitney's *U*-test compared with the MOMP group. <sup>c</sup>  $P < 0.05$  by the Mann-Whitney's *U*-test compared with the PmpG group.

**Table S3.** *C. muridarum*-specific IgG and IgA titers in vaginal washes the day before the *C. muridarum* i.n. challenge.

| Immunization groups | Anti-EB titer |     |
|---------------------|---------------|-----|
|                     | IgG           | IgA |
| Pgp3                | <10           | <10 |
| PmpG                | <10           | 10  |
| MOMP + Pgp3         | 160           | 10  |
| MOMP + PmpG         | 640           | 20  |
| MOMP                | 640           | 20  |
| PBS                 | <10           | <10 |

**Table S4.** In vitro cytokine production by T cells from immunized mice the day before challenge.

| Immunization group | EB stimulated                              |                                   | ConA stimulated                            |                                   |
|--------------------|--------------------------------------------|-----------------------------------|--------------------------------------------|-----------------------------------|
|                    | IFN- $\gamma$ (pg/ml)<br>(mean $\pm$ 1 SE) | IL-4 (pg/ml)<br>(mean $\pm$ 1 SE) | IFN- $\gamma$ (pg/ml)<br>(mean $\pm$ 1 SE) | IL-4 (pg/ml)<br>(mean $\pm$ 1 SE) |
| Pgp3               | <15 $\pm$ <15 <sup>a,b,c</sup>             | <4 $\pm$ <4 <sup>a,b</sup>        | 10,458.13 $\pm$ 1990.84                    | 86.82 $\pm$ 9.86                  |
| PmpG               | <15 $\pm$ <15 <sup>a,b,c</sup>             | <4 $\pm$ <4 <sup>a,b</sup>        | 5891.12 $\pm$ 1815.75                      | 39.43 $\pm$ 6.13                  |
| MOMP + Pgp3        | 60.70 $\pm$ 41.69 <sup>a,b,d</sup>         | <4 $\pm$ <4 <sup>a,b</sup>        | 11,845.08 $\pm$ 1218.38                    | 136.35 $\pm$ 50.19                |
| MOMP + PmpG        | 811.38 $\pm$ 411.17 <sup>d</sup>           | 4.43 $\pm$ 1.61 <sup>d</sup>      | 13,744.70 $\pm$ 2255.65                    | 143.28 $\pm$ 37.08                |

|      |                              |                          |                      |                |
|------|------------------------------|--------------------------|----------------------|----------------|
| MOMP | 796.05 ± 530.32 <sup>d</sup> | 9.59 ± 6.73 <sup>d</sup> | 9032.99 ± 1550.93    | 112.48 ± 11.42 |
| PBS  | <15 ± <15                    | <4 ± <4                  | 14,104.43 ± 2,481.78 | 87.58 ± 14.58  |

<sup>a</sup>  $P < 0.05$  by the Student's  $t$ -test compared with the MOMP group. <sup>b</sup>  $P < 0.05$  by the Student's  $t$ -test compared with the MOMP + PmpG group. <sup>c</sup>  $P < 0.05$  by the Student's  $t$ -test compared with the MOMP + Pgp3 group. <sup>d</sup>  $P < 0.05$  by the Student's  $t$ -test compared with the PBS group.
